# Supplementary material for: Incorporating Neutrophil-to-lymphocyte Ratio and Platelet-to-lymphocyte Ratio in Place of Neutrophil Count and Platelet Count Improves Prognostic Accuracy of the International Metastatic Renal Cell Carcinoma Database Consortium Model
Source: PubMed Central journal article supplement — Cancer Res Treat. 2017 Mar 3;50(1):103–10. doi: 10.4143/crt.2017.033 (PMC5784637; doi:10.4143/crt.2017.033), 2017-03-03
Supplement: crt-2017-033-suppl1.pdf [file crt-2017-033-suppl1.pdf]

**S1 Table.** Multivariable analysis

| Variable                                                                                | p-value | Hazard ratio | 95% CI     |       |
|-----------------------------------------------------------------------------------------|---------|--------------|------------|-------|
| <b>NLR <math>\geq</math> 2.5 and PLR <math>\geq</math> 150</b>                          |         |              |            |       |
| KPS $\leq$ 70                                                                           | < 0.001 | 6.14         | 3.01-12.54 |       |
| Time <sup>a)</sup> < 1 yr                                                               | 0.011   | 1.42         | 1.08-1.86  |       |
| Hemoglobin < LLN                                                                        | < 0.001 | 1.98         | 1.42-2.77  |       |
| Corrected calcium > ULN                                                                 | 0.036   | 1.53         | 1.03-2.27  |       |
| NLR $\geq$ 2.5                                                                          | 0.002   | 1.67         | 1.21-2.31  |       |
| PLR $\geq$ 150                                                                          | 0.037   | 1.40         | 1.02-1.92  |       |
| Bias-corrected concordance index=0.692, BIC=2,175.3, generalized R <sup>2</sup> =0.240  |         |              |            |       |
| <b>NLR <math>\geq</math> 2.5 and PLR <math>\geq</math> 157</b>                          |         |              |            |       |
| KPS $\leq$ 70                                                                           | < 0.001 | 6.78         | 3.29       | 13.96 |
| Time <sup>a)</sup> < 1 yr                                                               | 0.010   | 1.43         | 1.09       | 1.87  |
| Hemoglobin < LLN                                                                        | < 0.001 | 1.87         | 1.33       | 2.64  |
| Corrected calcium > ULN                                                                 | 0.028   | 1.56         | 1.05       | 2.33  |
| NLR $\geq$ 2.5                                                                          | 0.007   | 1.58         | 1.14       | 2.20  |
| PLR $\geq$ 157                                                                          | 0.010   | 1.54         | 1.11       | 2.14  |
| Bias-corrected concordance index=0.697, BIC=2,172.9, generalized R <sup>2</sup> =0.246  |         |              |            |       |
| <b>NLR <math>\geq</math> 2.5 and PLR <math>\geq</math> 210</b>                          |         |              |            |       |
| KPS $\leq$ 70                                                                           | < 0.001 | 6.34         | 3.09       | 13.01 |
| Time <sup>a)</sup> < 1 yr                                                               | 0.013   | 1.41         | 1.07       | 1.85  |
| Hemoglobin < LLN                                                                        | < 0.001 | 1.94         | 1.37       | 2.74  |
| Corrected calcium > ULN                                                                 | 0.052   | 1.48         | 1.00       | 2.21  |
| NLR $\geq$ 2.5                                                                          | 0.001   | 1.69         | 1.22       | 2.33  |
| PLR $\geq$ 210                                                                          | 0.041   | 1.42         | 1.01       | 1.98  |
| Bias-corrected concordance index=0.697, BIC=2,175.6, generalized R <sup>2</sup> =0.239  |         |              |            |       |
| <b>NLR <math>\geq</math> 3.0 and PLR <math>\geq</math> 150</b>                          |         |              |            |       |
| KPS $\leq$ 70                                                                           | < 0.001 | 5.56         | 2.74       | 11.27 |
| Time <sup>a)</sup> < 1 yr                                                               | 0.009   | 1.44         | 1.10       | 1.88  |
| Hemoglobin < LLN                                                                        | < 0.001 | 2.03         | 1.45       | 2.83  |
| Corrected calcium > ULN                                                                 | 0.045   | 1.50         | 1.01       | 2.24  |
| NLR $\geq$ 3.0                                                                          | 0.040   | 1.38         | 1.01       | 1.87  |
| PLR $\geq$ 150                                                                          | 0.020   | 1.48         | 1.06       | 2.05  |
| Bias-corrected concordance index=0.692, BIC=2,181.2, generalized R <sup>2</sup> =0.226  |         |              |            |       |
| <b>NLR <math>\geq</math> 3.0 and PLR <math>\geq</math> 157</b>                          |         |              |            |       |
| KPS $\leq$ 70                                                                           | < 0.001 | 6.36         | 3.09       | 13.09 |
| Time <sup>a)</sup> < 1 yr                                                               | 0.007   | 1.45         | 1.11       | 1.90  |
| Hemoglobin < LLN                                                                        | < 0.001 | 1.89         | 1.34       | 2.66  |
| Corrected calcium > ULN                                                                 | 0.029   | 1.56         | 1.05       | 2.34  |
| NLR $\geq$ 3.0                                                                          | 0.121   | 1.28         | 0.94       | 1.76  |
| PLR $\geq$ 157                                                                          | 0.003   | 1.66         | 1.18       | 2.34  |
| Bias-corrected concordance index=0.696, BIC=2,178.1, generalized R <sup>2</sup> =0.233. |         |              |            |       |
| <b>NLR <math>\geq</math> 3.0 and PLR <math>\geq</math> 210</b>                          |         |              |            |       |
| KPS $\leq$ 70                                                                           | < 0.001 | 5.79         | 2.84       | 11.83 |
| Time <sup>a)</sup> < 1 yr                                                               | 0.011   | 1.42         | 1.09       | 1.87  |
| Hemoglobin < LLN                                                                        | < 0.001 | 1.98         | 1.40       | 2.81  |
| Corrected calcium > ULN                                                                 | 0.059   | 1.47         | 0.99       | 2.19  |
| NLR $\geq$ 3.0                                                                          | 0.051   | 1.38         | 1.00       | 1.90  |

|                                                                              |         |      |      |       |
|------------------------------------------------------------------------------|---------|------|------|-------|
| PLR $\geq$ 210                                                               | 0.032   | 1.48 | 1.03 | 2.12  |
| Bias-corrected concordance index=0.696, BIC=2,182.1, generalized $R^2=0.224$ |         |      |      |       |
| <b>NLR <math>\geq</math> 3.6 and PLR <math>\geq</math> 150</b>               |         |      |      |       |
| KPS $\leq$ 70                                                                | < 0.001 | 5.62 | 2.78 | 11.36 |
| Time <sup>a)</sup> < 1 yr                                                    | 0.006   | 1.47 | 1.12 | 1.92  |
| Hemoglobin < LLN                                                             | < 0.001 | 2.05 | 1.47 | 2.87  |
| Corrected calcium > ULN                                                      | 0.052   | 1.49 | 1.00 | 2.22  |
| NLR $\geq$ 3.6                                                               | 0.011   | 1.49 | 1.09 | 2.02  |
| PLR $\geq$ 150                                                               | 0.019   | 1.47 | 1.06 | 2.02  |
| Bias-corrected concordance index=0.698, BIC=2,179.1, generalized $R^2=0.231$ |         |      |      |       |
| <b>NLR <math>\geq</math> 3.6 and PLR <math>\geq</math> 157</b>               |         |      |      |       |
| KPS $\leq$ 70                                                                | < 0.001 | 6.43 | 3.13 | 13.20 |
| Time <sup>a)</sup> < 1 yr                                                    | 0.005   | 1.47 | 1.13 | 1.93  |
| Hemoglobin < LLN                                                             | < 0.001 | 1.91 | 1.35 | 2.70  |
| Corrected calcium > ULN                                                      | 0.034   | 1.54 | 1.03 | 2.31  |
| NLR $\geq$ 3.6                                                               | 0.038   | 1.39 | 1.02 | 1.91  |
| PLR $\geq$ 157                                                               | 0.004   | 1.64 | 1.18 | 2.28  |
| Bias-corrected concordance index=0.699, BIC=2,176.2, generalized $R^2=0.238$ |         |      |      |       |
| <b>NLR <math>\geq</math> 3.6 and PLR <math>\geq</math> 210</b>               |         |      |      |       |
| KPS $\leq$ 70                                                                | < 0.001 | 5.79 | 2.84 | 11.78 |
| Time <sup>a)</sup> < 1 yr                                                    | 0.007   | 1.46 | 1.11 | 1.91  |
| Hemoglobin < LLN                                                             | < 0.001 | 2.03 | 1.44 | 2.88  |
| Corrected calcium > ULN                                                      | 0.067   | 1.45 | .97  | 2.17  |
| NLR $\geq$ 3.6                                                               | 0.020   | 1.47 | 1.06 | 2.04  |
| PLR $\geq$ 210                                                               | 0.045   | 1.45 | 1.01 | 2.07  |
| Bias-corrected concordance index=0.694, BIC=2,180.6, generalized $R^2=0.227$ |         |      |      |       |
| <b>NLR <math>\geq</math> 4.0 and PLR <math>\geq</math> 150</b>               |         |      |      |       |
| KPS $\leq$ 70                                                                | < 0.001 | 5.40 | 2.67 | 10.94 |
| Time <sup>a)</sup> < 1 yr                                                    | 0.011   | 1.43 | 1.09 | 1.87  |
| Hemoglobin < LLN                                                             | < 0.001 | 2.13 | 1.52 | 2.97  |
| Corrected calcium > ULN                                                      | 0.020   | 1.60 | 1.08 | 2.39  |
| NLR $\geq$ 4.0                                                               | 0.003   | 1.66 | 1.19 | 2.31  |
| PLR $\geq$ 150                                                               | 0.033   | 1.42 | 1.03 | 1.97  |
| Bias-corrected concordance index=0.690, BIC=2,176.7, generalized $R^2=0.237$ |         |      |      |       |
| <b>NLR <math>\geq</math> 4.0 and PLR <math>\geq</math> 157</b>               |         |      |      |       |
| KPS $\leq$ 70                                                                | < 0.001 | 6.13 | 2.98 | 12.61 |
| Time <sup>a)</sup> < 1 yr                                                    | 0.009   | 1.44 | 1.10 | 1.89  |
| Hemoglobin < LLN                                                             | < 0.001 | 1.98 | 1.40 | 2.80  |
| Corrected calcium > ULN                                                      | 0.014   | 1.65 | 1.11 | 2.45  |
| NLR $\geq$ 4.0                                                               | 0.011   | 1.55 | 1.11 | 2.18  |
| PLR $\geq$ 157                                                               | 0.007   | 1.58 | 1.13 | 2.21  |
| Bias-corrected concordance index=0.697, BIC=2,174.1, generalized $R^2=0.243$ |         |      |      |       |
| <b>NLR <math>\geq</math> 4.0 and PLR <math>\geq</math> 210</b>               |         |      |      |       |
| KPS $\leq$ 70                                                                | < 0.001 | 5.48 | 2.69 | 11.18 |
| Time <sup>a)</sup> < 1 yr                                                    | 0.010   | 1.43 | 1.09 | 1.88  |
| Hemoglobin < LLN                                                             | < 0.001 | 2.15 | 1.51 | 3.07  |
| Corrected calcium > ULN                                                      | 0.023   | 1.58 | 1.06 | 2.36  |
| NLR $\geq$ 4.0                                                               | 0.009   | 1.65 | 1.13 | 2.40  |
| PLR $\geq$ 210                                                               | 0.149   | 1.33 | .90  | 1.96  |
| Bias-corrected concordance index=0.687, BIC=2,179.2, generalized $R^2=0.231$ |         |      |      |       |

CI, confidence interval; NLR, neutrophil-to-lymphocyte ratio; PLR, platelet-to-lymphocyte ratio; KPS, Karnofsky performance status; LLN, lower limit of normal; ULN, upper limit of normal; BIC, Bayesian Information Criterion. <sup>a)</sup>Time from diagnosis to treatment initiation.
