# Supplementary material for: Incorporating Neutrophil-to-lymphocyte Ratio and Platelet-to-lymphocyte Ratio in Place of Neutrophil Count and Platelet Count Improves Prognostic Accuracy of the International Metastatic Renal Cell Carcinoma Database Consortium Model
Source: PubMed Central journal article supplement — Cancer Res Treat. 2017 Mar 3;50(1):103–10. doi: 10.4143/crt.2017.033 (PMC5784637; doi:10.4143/crt.2017.033), 2017-03-03
Supplement: crt-2017-033-suppl2.pdf [file crt-2017-033-suppl2.pdf]

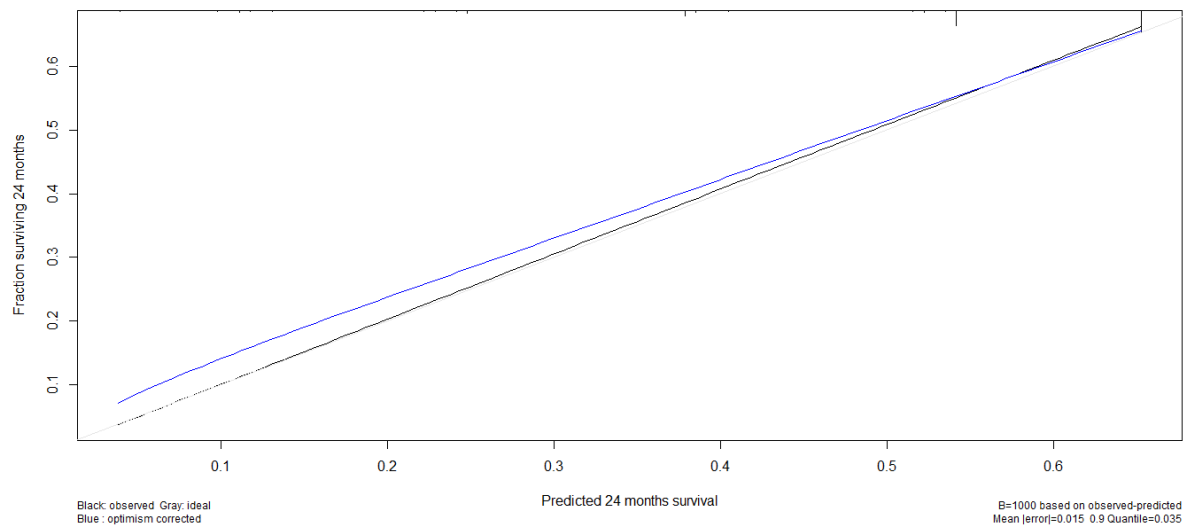

**S2 Fig.** Calibration plot for the International Metastatic Renal Cell Carcinoma Database Consortium model using individual risk factors.
