# Supplementary material for: Incorporating Neutrophil-to-lymphocyte Ratio and Platelet-to-lymphocyte Ratio in Place of Neutrophil Count and Platelet Count Improves Prognostic Accuracy of the International Metastatic Renal Cell Carcinoma Database Consortium Model
Source: PubMed Central journal article supplement — Cancer Res Treat. 2017 Mar 3;50(1):103–10. doi: 10.4143/crt.2017.033 (PMC5784637; doi:10.4143/crt.2017.033), 2017-03-03
Supplement: crt-2017-033-suppl6.pdf [file crt-2017-033-suppl6.pdf]

**S6 Table.** Results for Grønnesby and Borgan test

| Decile of risk                                    | No. of patients | No. of events | No. of expected events | Z statistic | p-value |
|---------------------------------------------------|-----------------|---------------|------------------------|-------------|---------|
| IMDC model using individual risk factors          |                 |               |                        |             |         |
| 1                                                 | 32              | 23            | 24.99                  | -0.399      | 0.690   |
| 2                                                 | 32              | 21            | 21.23                  | -0.050      | 0.961   |
| 3                                                 | 32              | 16            | 15.69                  | 0.079       | 0.937   |
| 4                                                 | 32              | 16            | 11.96                  | 1.167       | 0.243   |
| 5                                                 | 32              | 22            | 28.72                  | -1.255      | 0.210   |
| 6                                                 | 32              | 21            | 18.37                  | 0.614       | 0.539   |
| 7                                                 | 32              | 17            | 13.64                  | 0.909       | 0.363   |
| 8                                                 | 32              | 26            | 24.05                  | 0.398       | 0.691   |
| 9                                                 | 32              | 26            | 32.41                  | -1.126      | 0.260   |
| 10                                                | 32              | 31            | 27.93                  | 0.582       | 0.561   |
| Modified-IMDC model using individual risk factors |                 |               |                        |             |         |
| 1                                                 | 32              | 19            | 22.34                  | -0.708      | 0.479   |
| 2                                                 | 32              | 15            | 12.56                  | 0.687       | 0.492   |
| 3                                                 | 32              | 21            | 18.84                  | 0.497       | 0.619   |
| 4                                                 | 32              | 16            | 18.07                  | -0.487      | 0.626   |
| 5                                                 | 32              | 21            | 19.06                  | 0.445       | 0.656   |
| 6                                                 | 32              | 21            | 23.54                  | -0.524      | 0.601   |
| 7                                                 | 32              | 25            | 10.14                  | 1.082       | 0.279   |
| 8                                                 | 32              | 26            | 27.46                  | -0.280      | 0.780   |
| 9                                                 | 32              | 23            | 30.01                  | -1.280      | 0.201   |
| 10                                                | 33              | 32            | 26.97                  | 0.969       | 0.333   |
| IMDC model using the three risk groups            |                 |               |                        |             |         |
| 1                                                 | 32              | 23            | 24.47                  | -0.297      | 0.767   |
| 2                                                 | 32              | 21            | 20.93                  | 0.015       | 0.988   |
| 3                                                 | 32              | 16            | 15.66                  | 0.085       | 0.932   |
| 4                                                 | 32              | 16            | 13.57                  | 0.659       | 0.510   |
| 5                                                 | 32              | 26            | 30.72                  | -0.852      | 0.394   |
| 6                                                 | 32              | 26            | 27.50                  | -0.286      | 0.775   |
| 7                                                 | 32              | 28            | 24.55                  | 0.696       | 0.486   |
| 8                                                 | 32              | 20            | 20.94                  | -0.206      | 0.837   |
| 9                                                 | 32              | 15            | 11.70                  | 0.965       | 0.334   |
| 10                                                | 33              | 28            | 28.95                  | -0.177      | 0.859   |
| Modified-IMDC model using the three risk          |                 |               |                        |             |         |

| groups |    |    |       |        |       |
|--------|----|----|-------|--------|-------|
| 1      | 32 | 19 | 21.28 | -0.493 | 0.622 |
| 2      | 32 | 15 | 12.17 | 0.812  | 0.417 |
| 3      | 32 | 25 | 21.52 | 0.751  | 0.453 |
| 4      | 32 | 23 | 27.41 | -0.842 | 0.400 |
| 5      | 32 | 22 | 28.79 | -1.265 | 0.206 |
| 6      | 32 | 22 | 17.95 | 0.956  | 0.339 |
| 7      | 32 | 15 | 11.81 | 0.928  | 0.353 |
| 8      | 32 | 25 | 28.58 | -0.700 | 0.503 |
| 9      | 32 | 30 | 26.90 | 0.597  | 0.551 |
| 10     | 33 | 23 | 22.60 | 0.084  | 0.933 |

---

IMDC, International Metastatic Renal Cell Carcinoma Database Consortium.
